# Supplementary material for: A Novel Tool to Assess the Risk for African Swine Fever in Hunting Environments: The Balkan Experience
Source: MDPI journal article supplement (doi:10.3390/pathogens11121466), 2022-12-03

**Distribution for Risk of ASF introduction Score:**

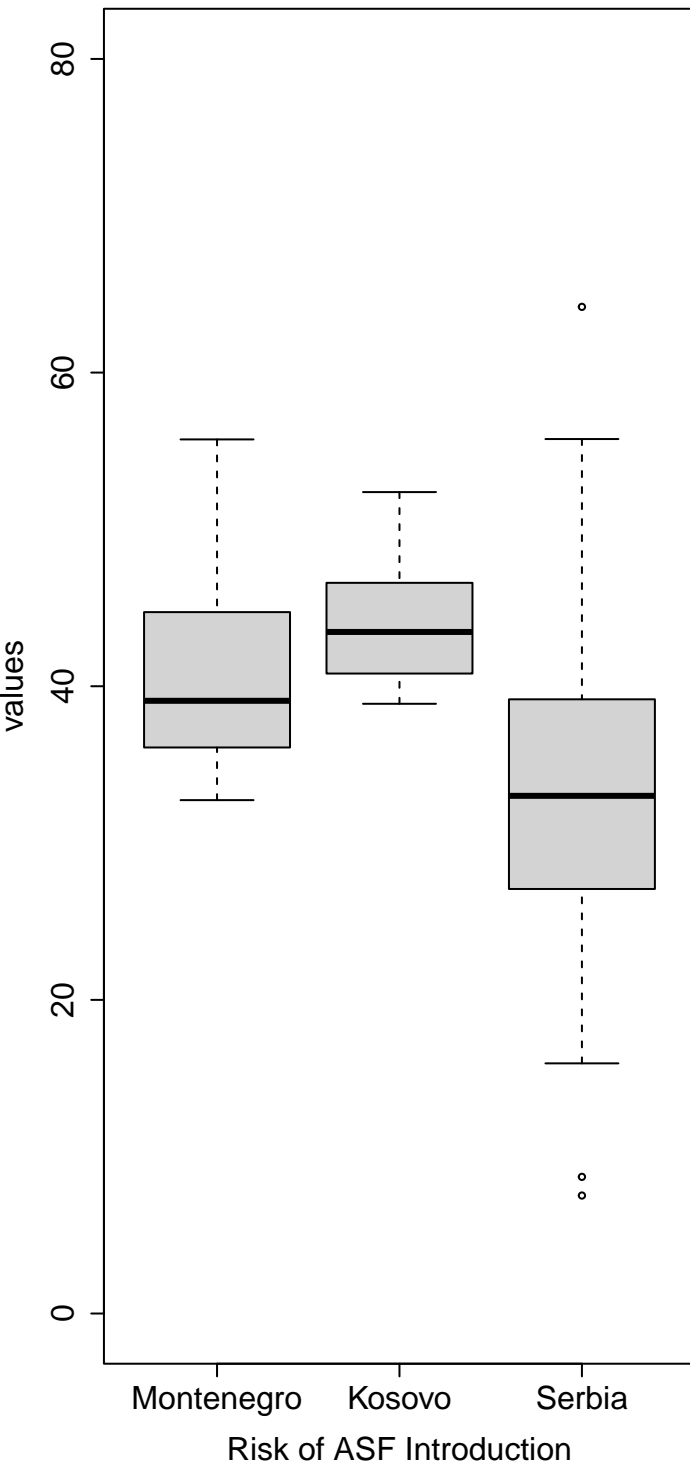

**Distribution of Risk for ASF spread Scores**

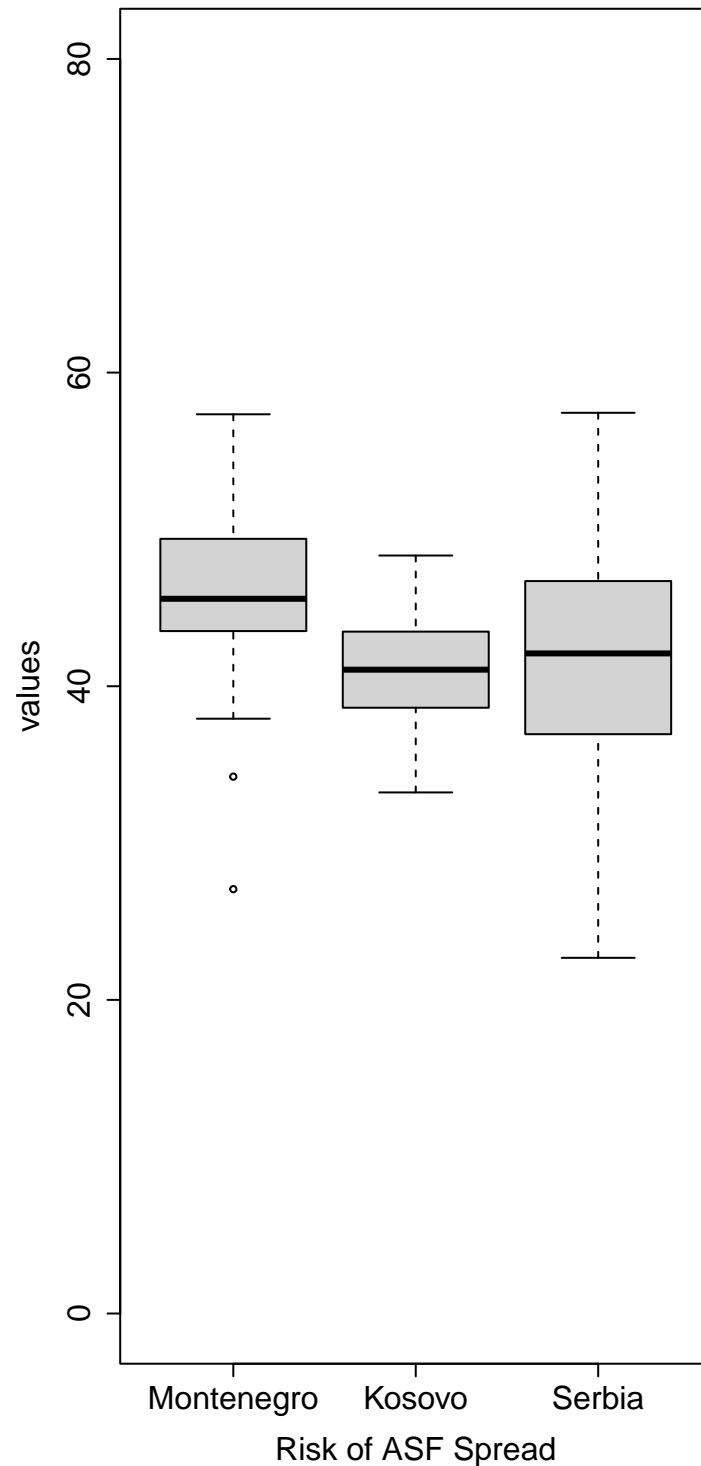

**Distribution for ASF detection Scores**

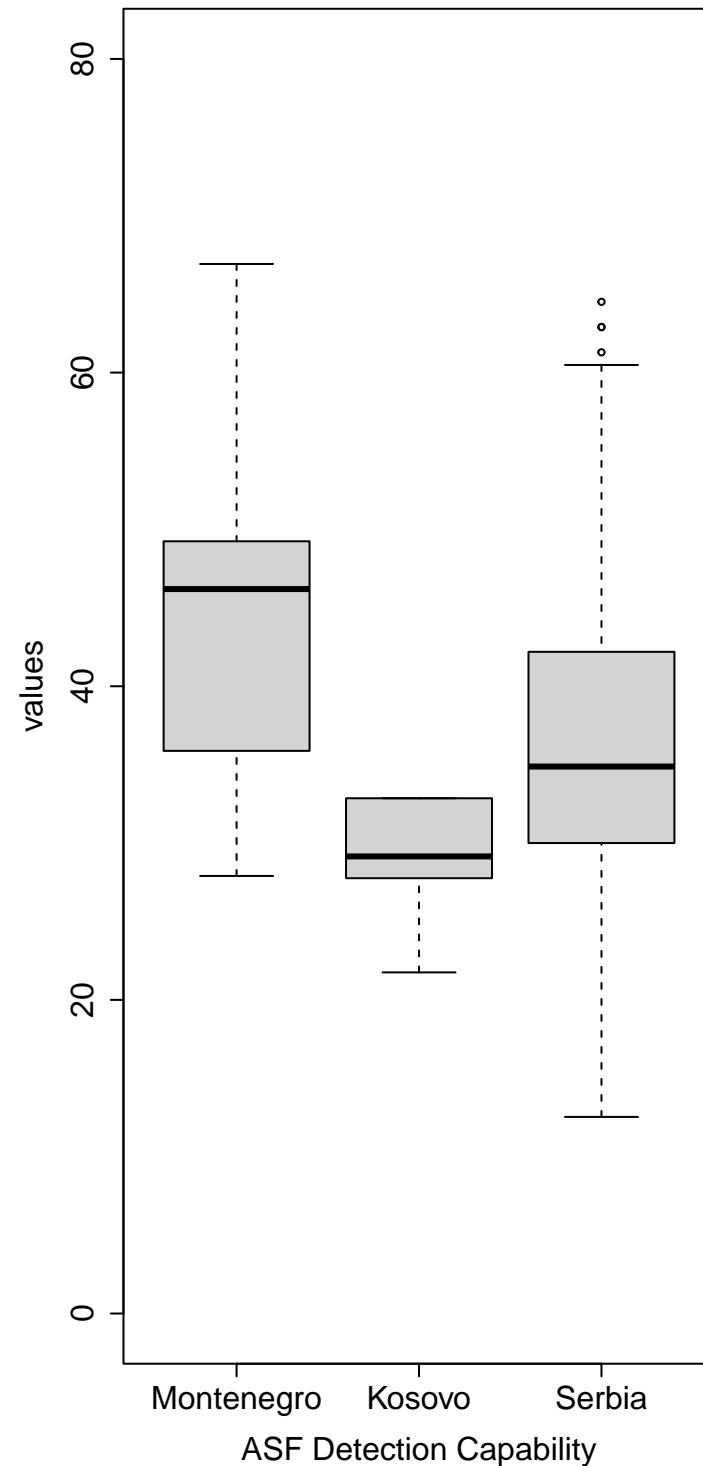

Supplement: s1 [file s1]
