# Supplementary material for: A Novel Tool to Assess the Risk for African Swine Fever in Hunting Environments: The Balkan Experience
Source: MDPI journal article supplement (doi:10.3390/pathogens11121466), 2022-12-03

## Answers of feasibility questions by hunting ground managers

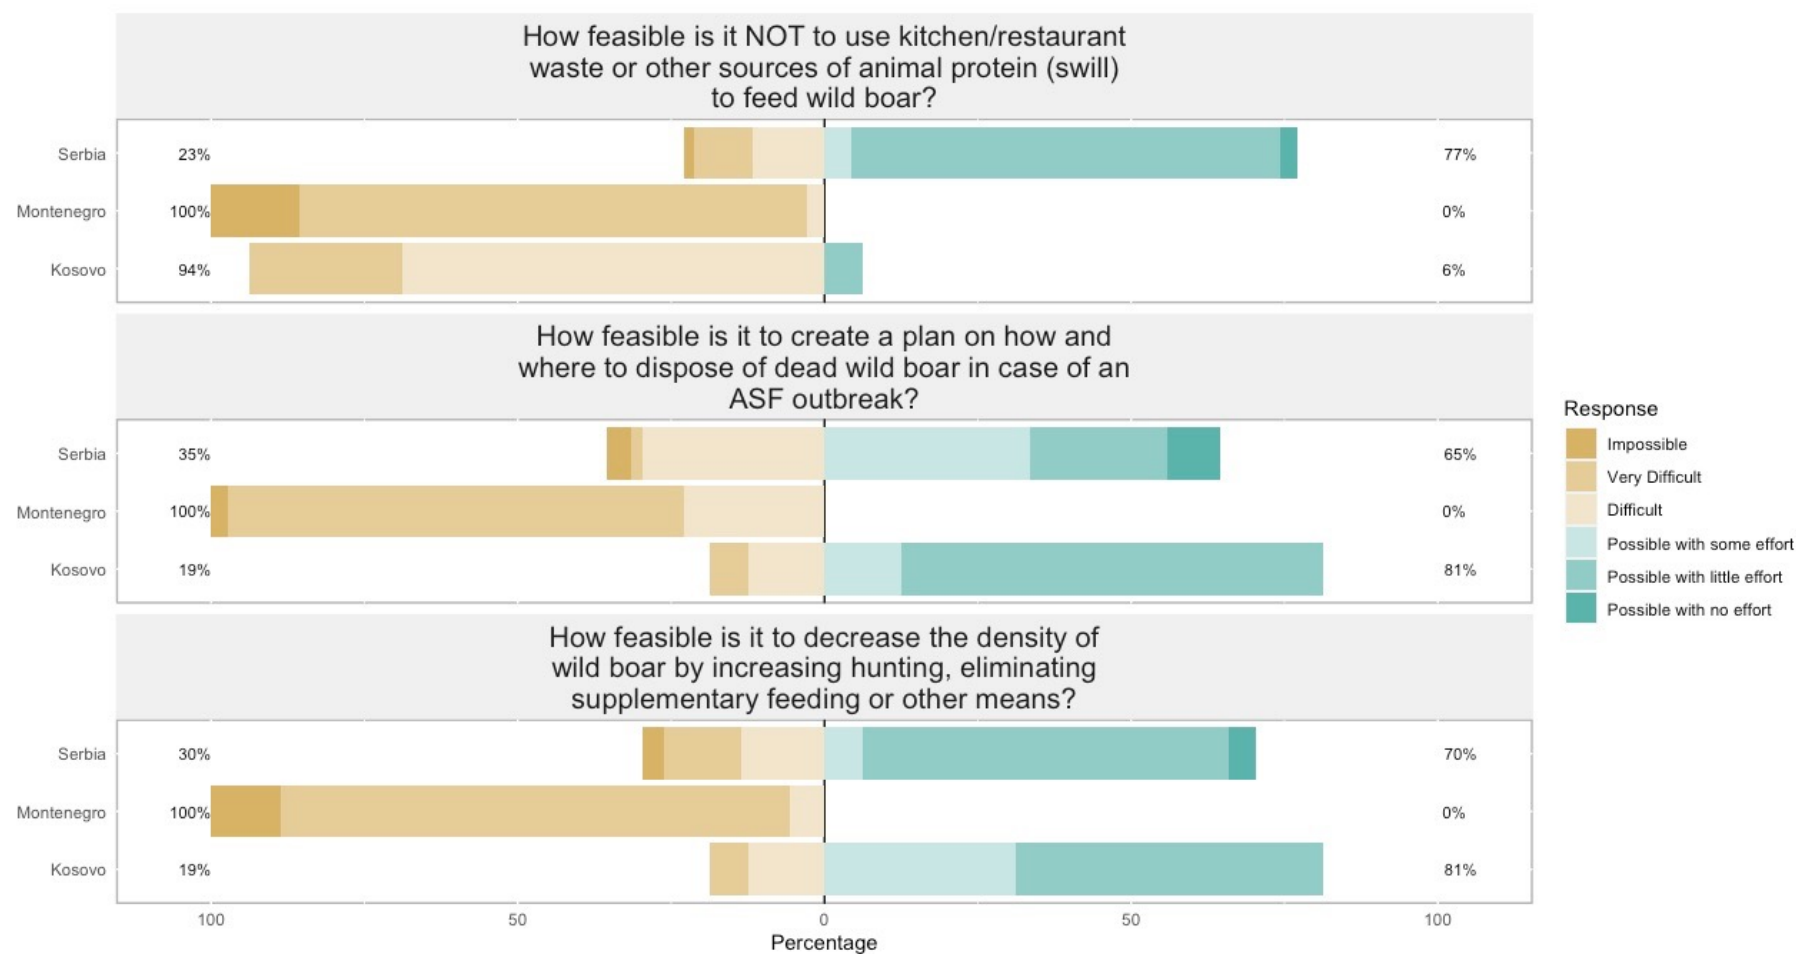

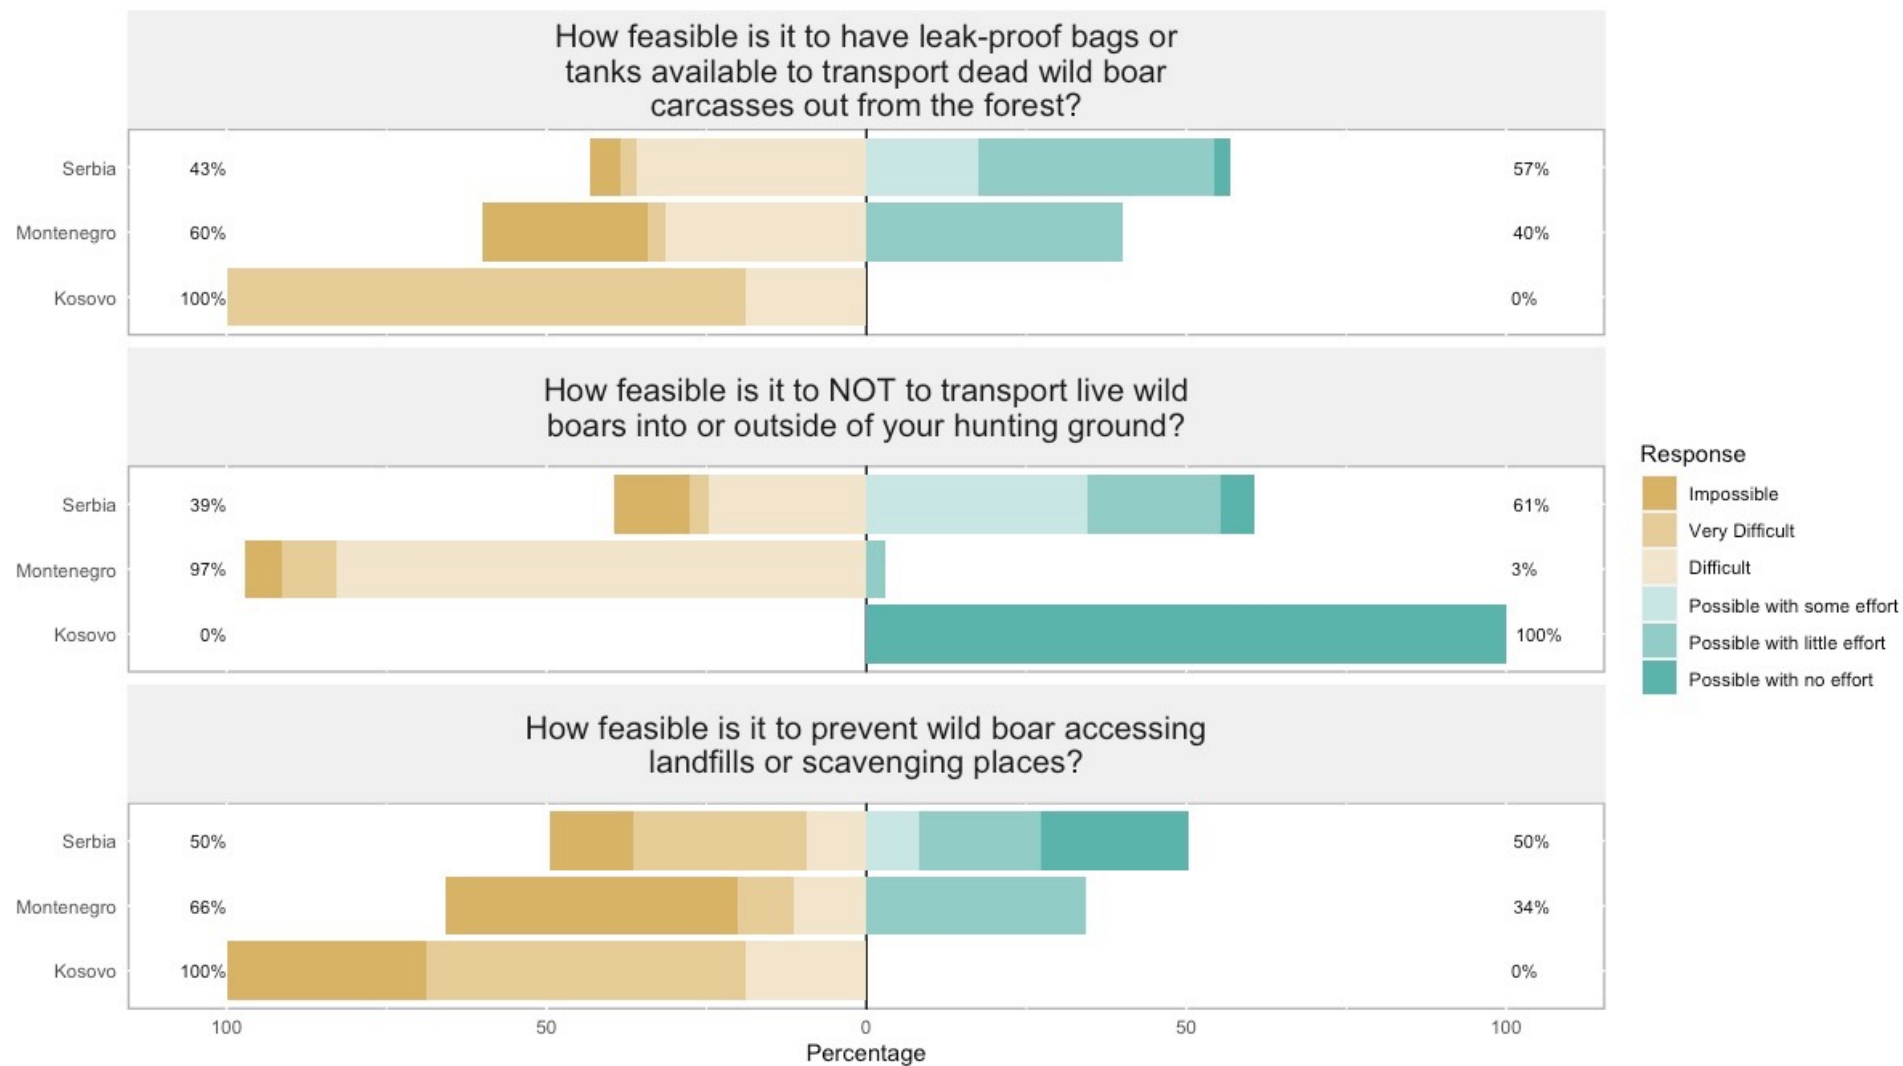

### How feasible is it to dispose of all or most found dead wild boar?

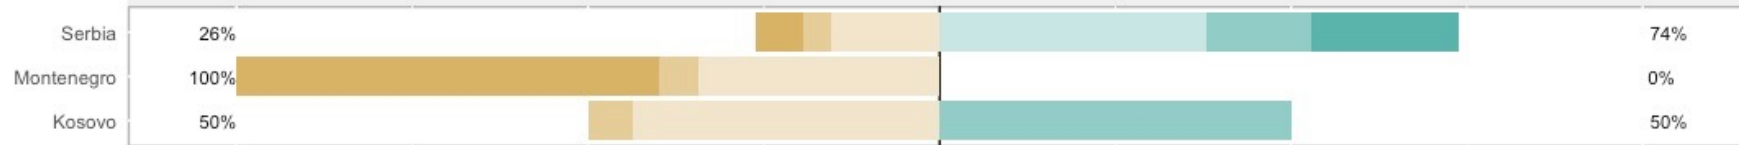

### How feasible is it to forbid visitors and hunters from bringing meat products into the HG's HPA?

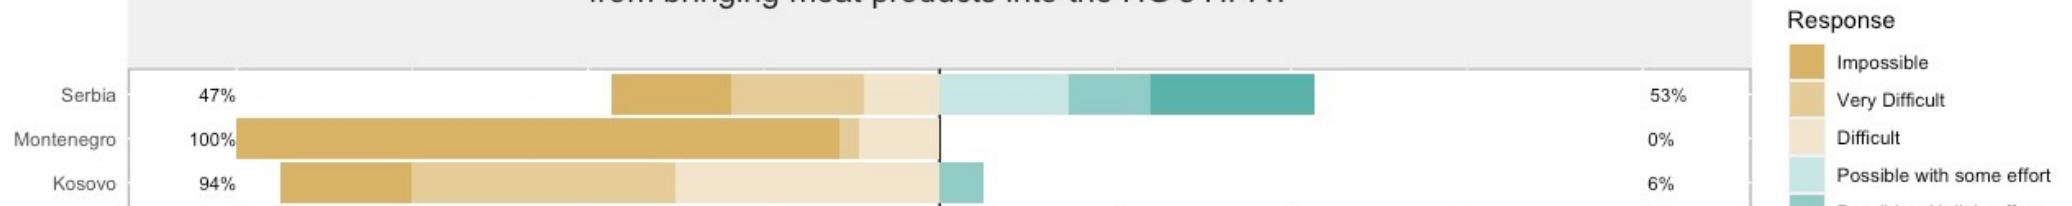

### How feasible is it to inform the public and hunters (through posters, flyers or face-to-face briefings) about the importance to report dead wild boar and about the main ASF prevention measures?

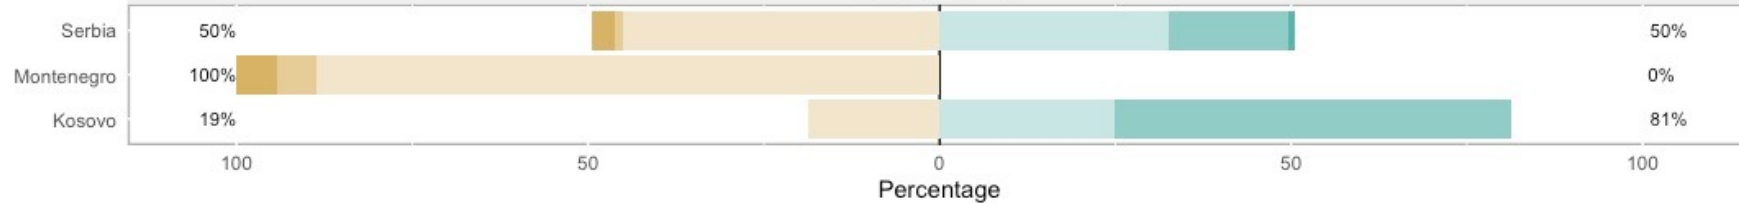

Percentage

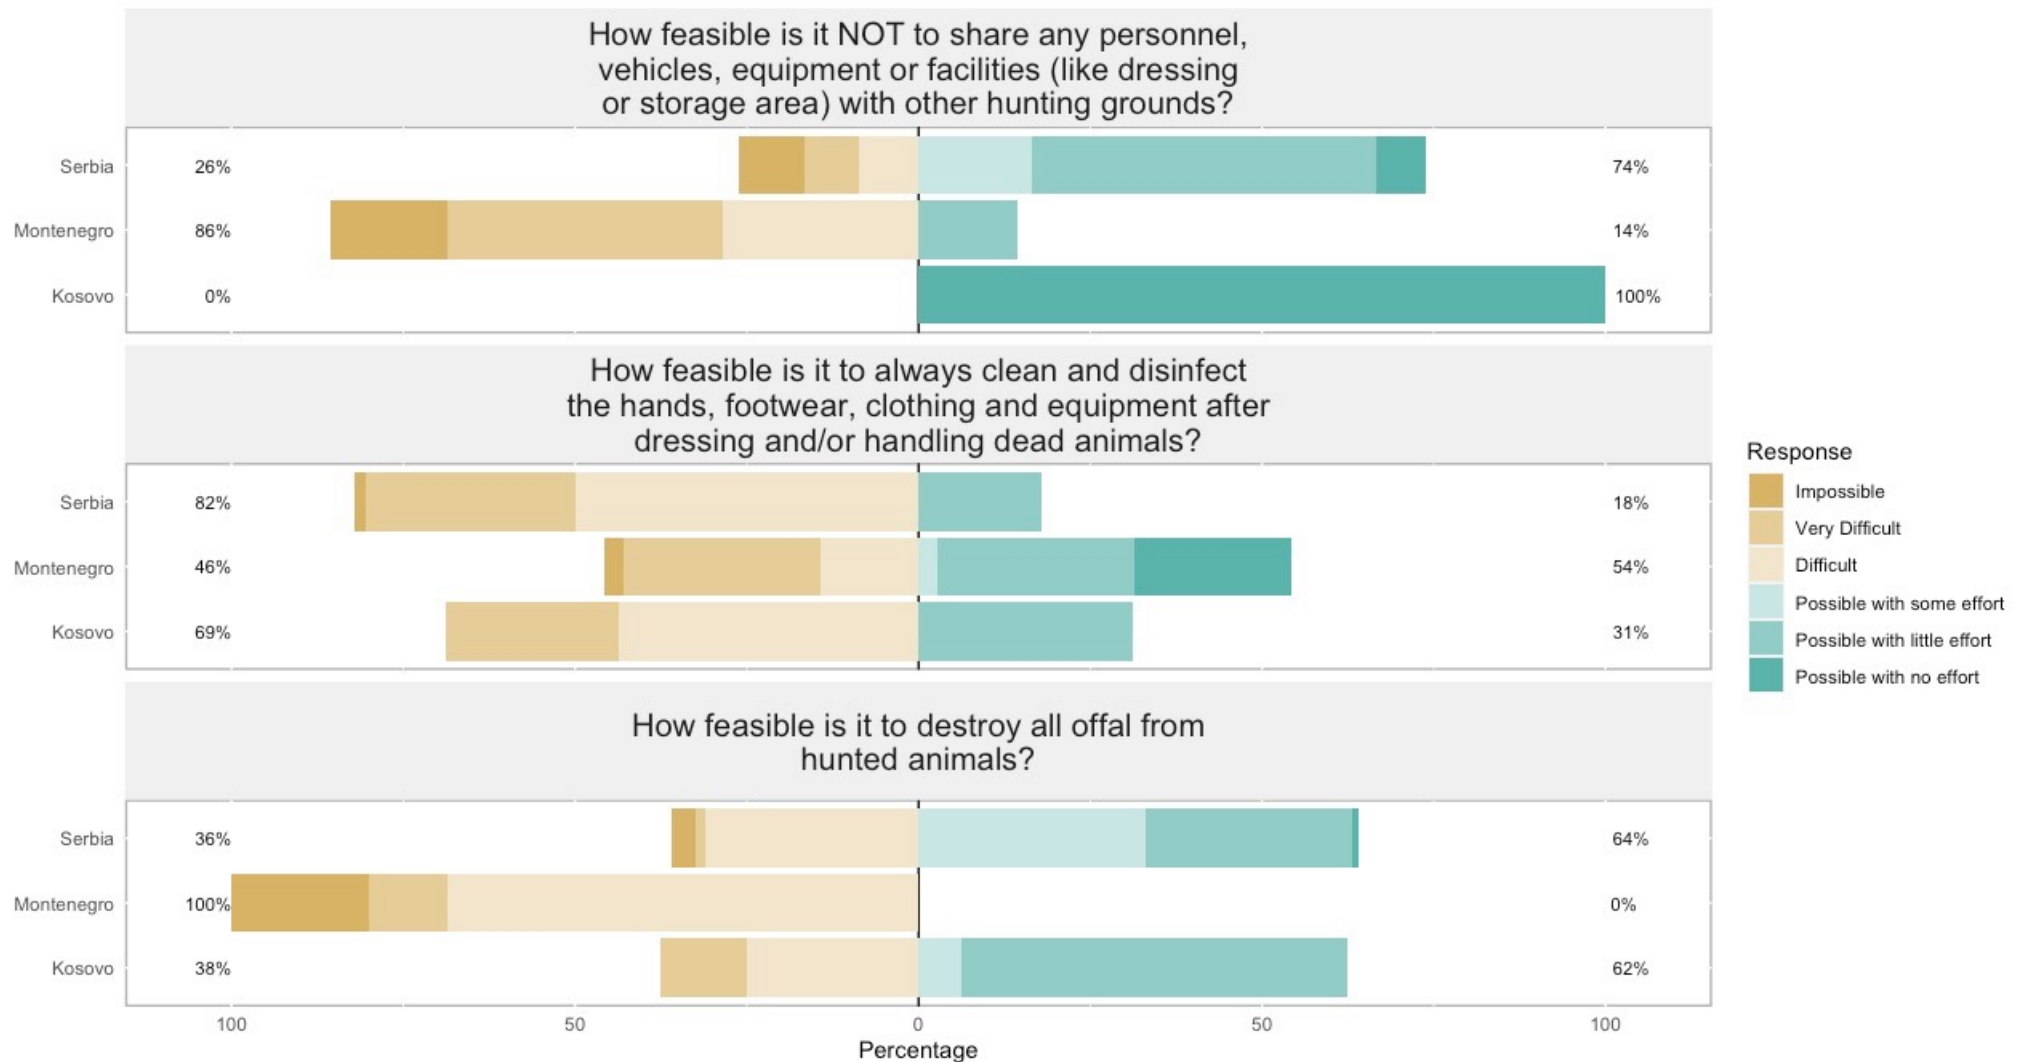

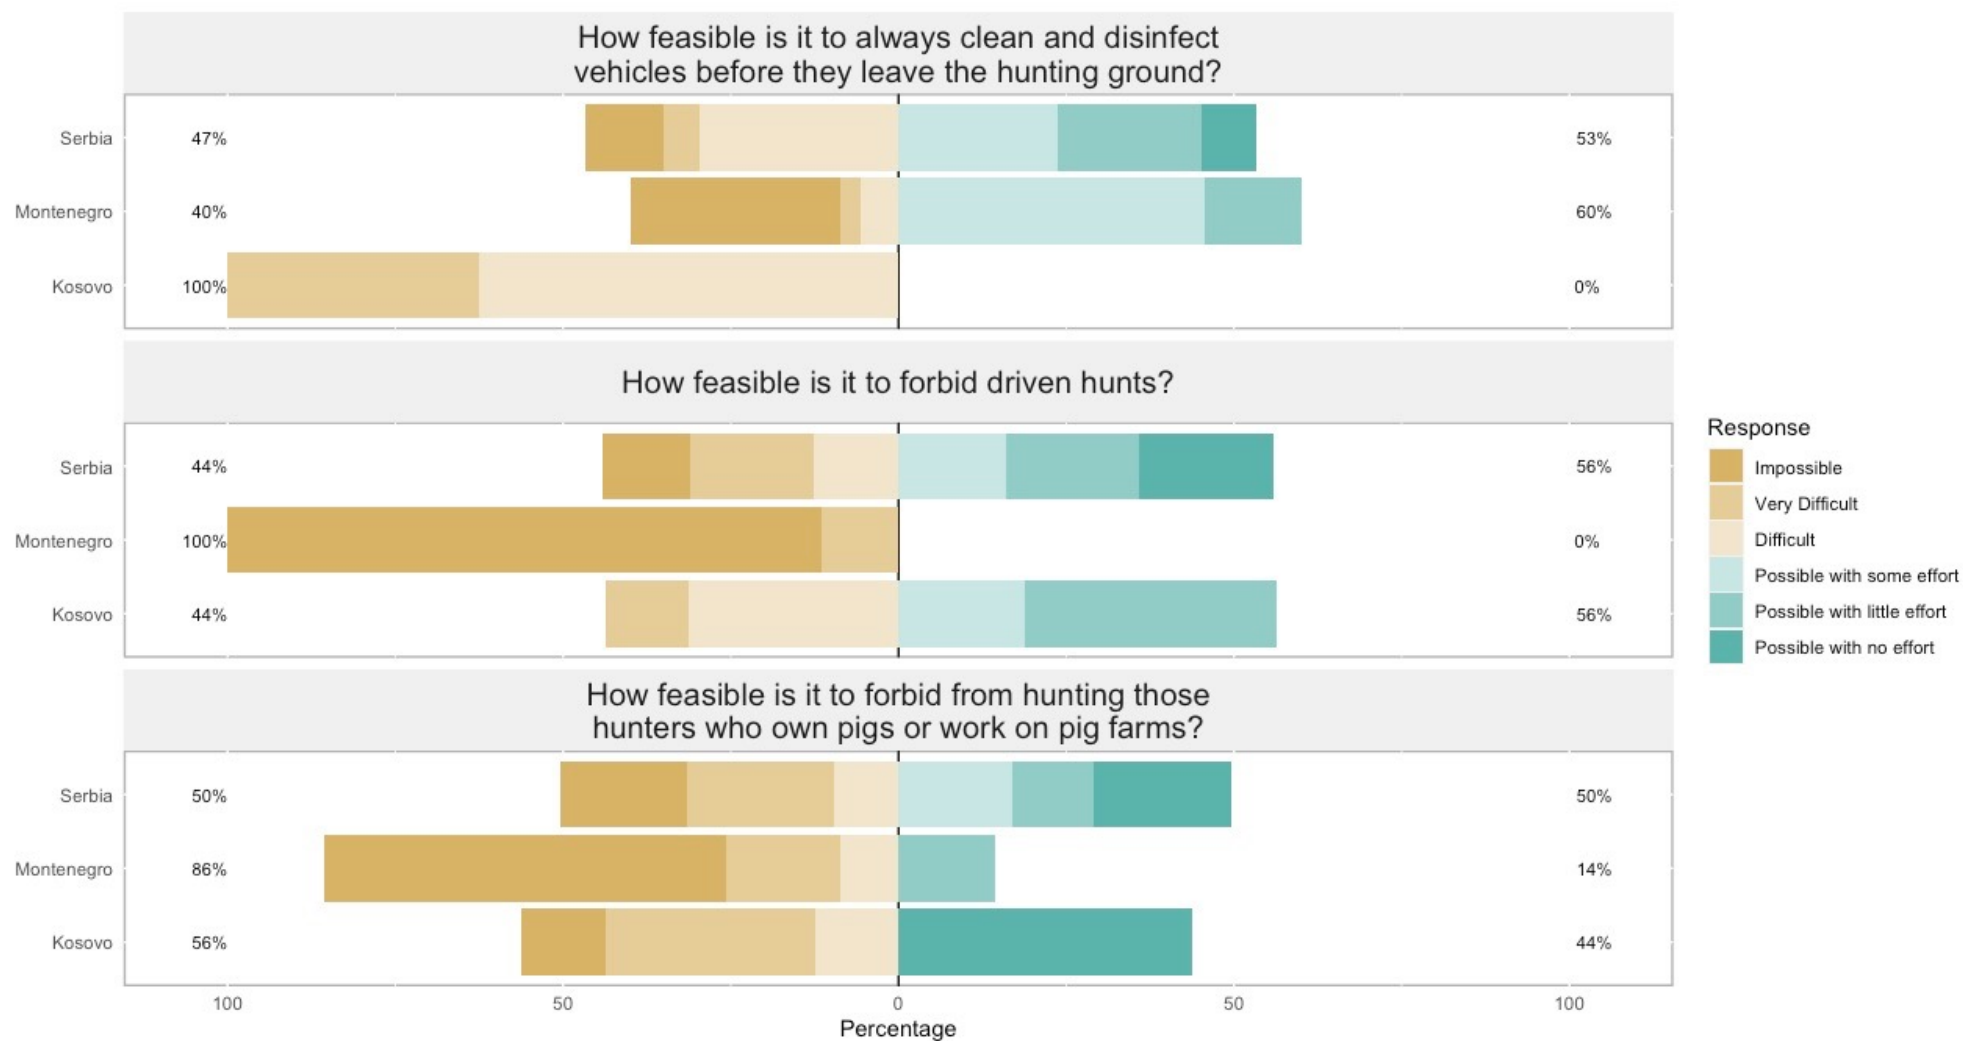

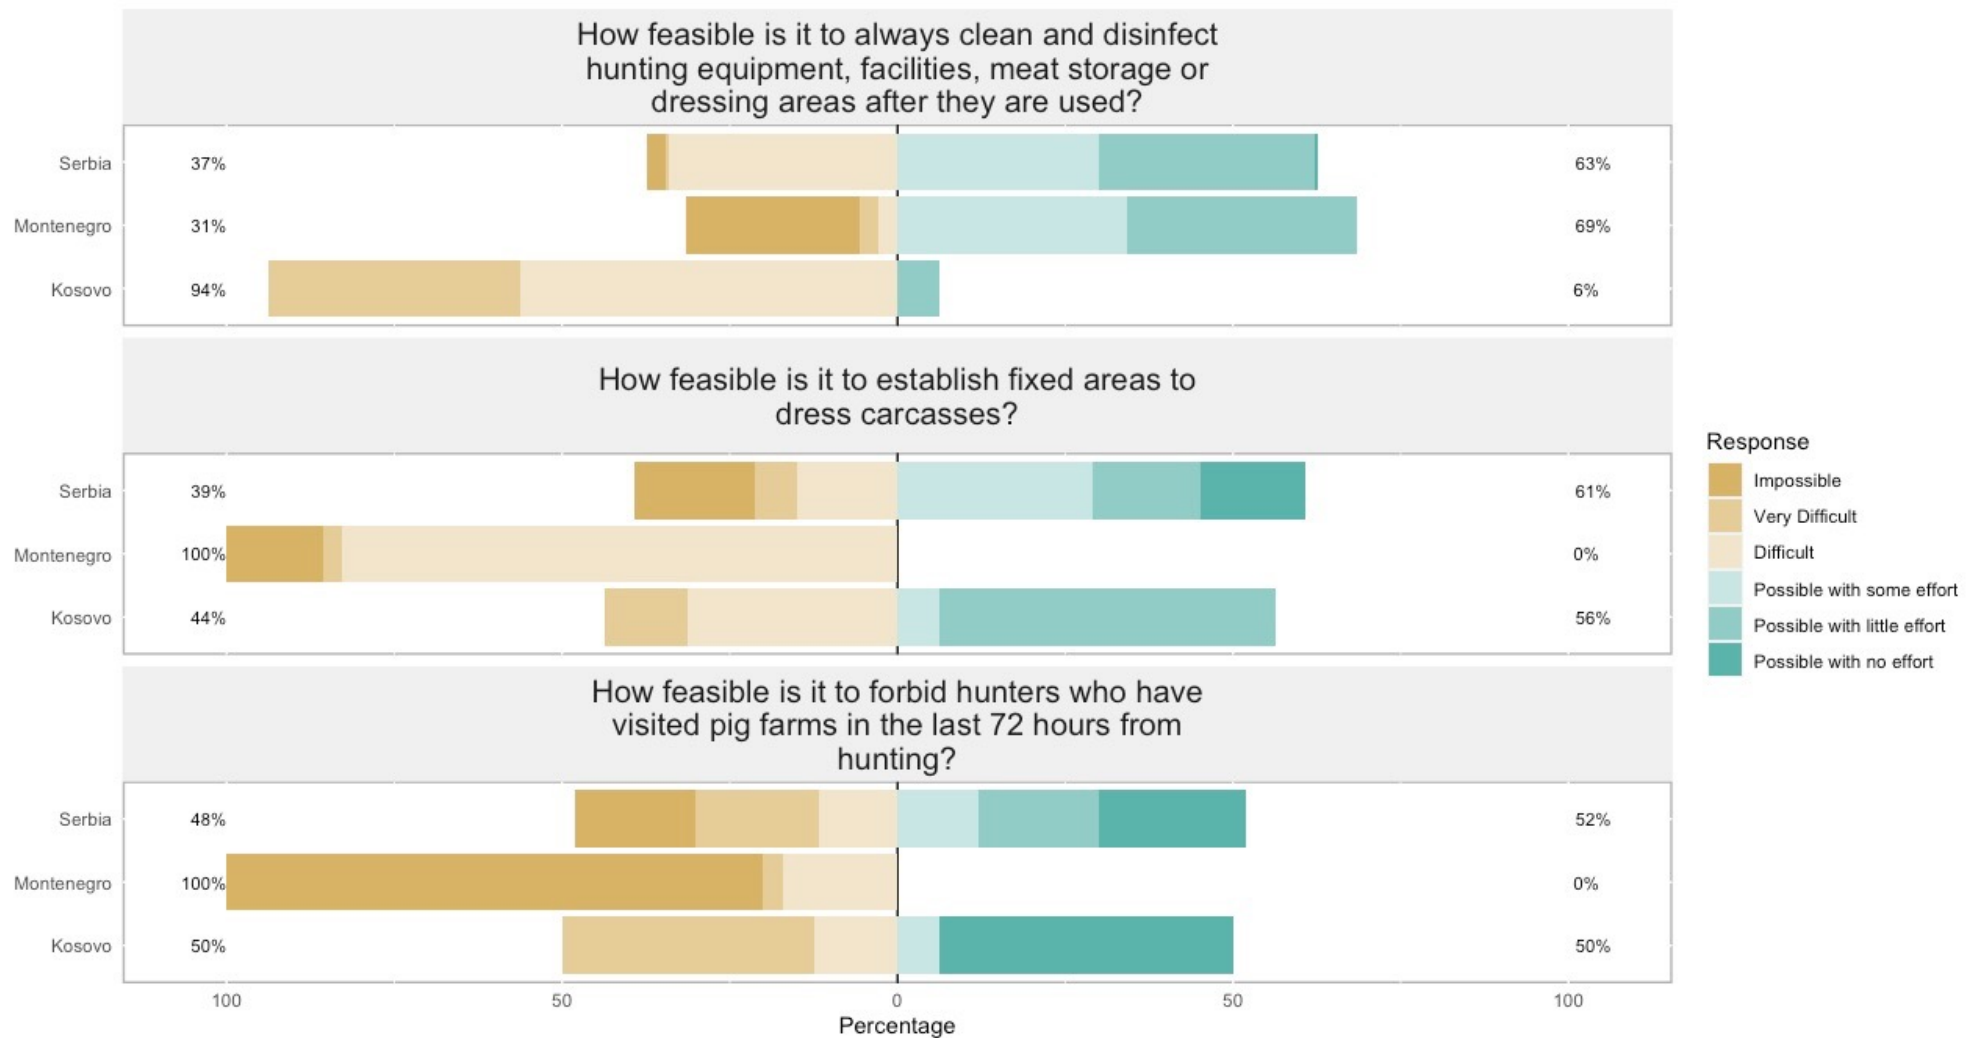

Supplement: s1 [file s1]
