# Supplementary material for: A Novel Tool to Assess the Risk for African Swine Fever in Hunting Environments: The Balkan Experience
Source: MDPI journal article supplement (doi:10.3390/pathogens11121466), 2022-12-03
Supplement: s1 [file s1]

## Supplementary Material File S4

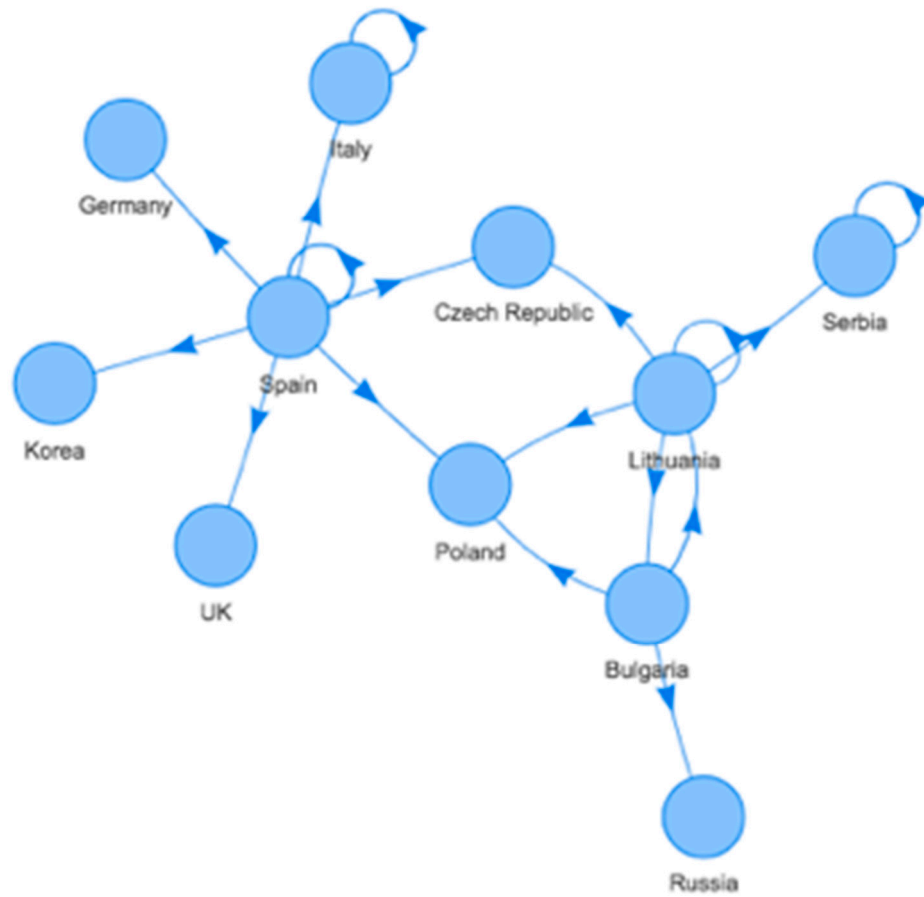

Figure S1 – Network countries analysis of the experts in the first wave

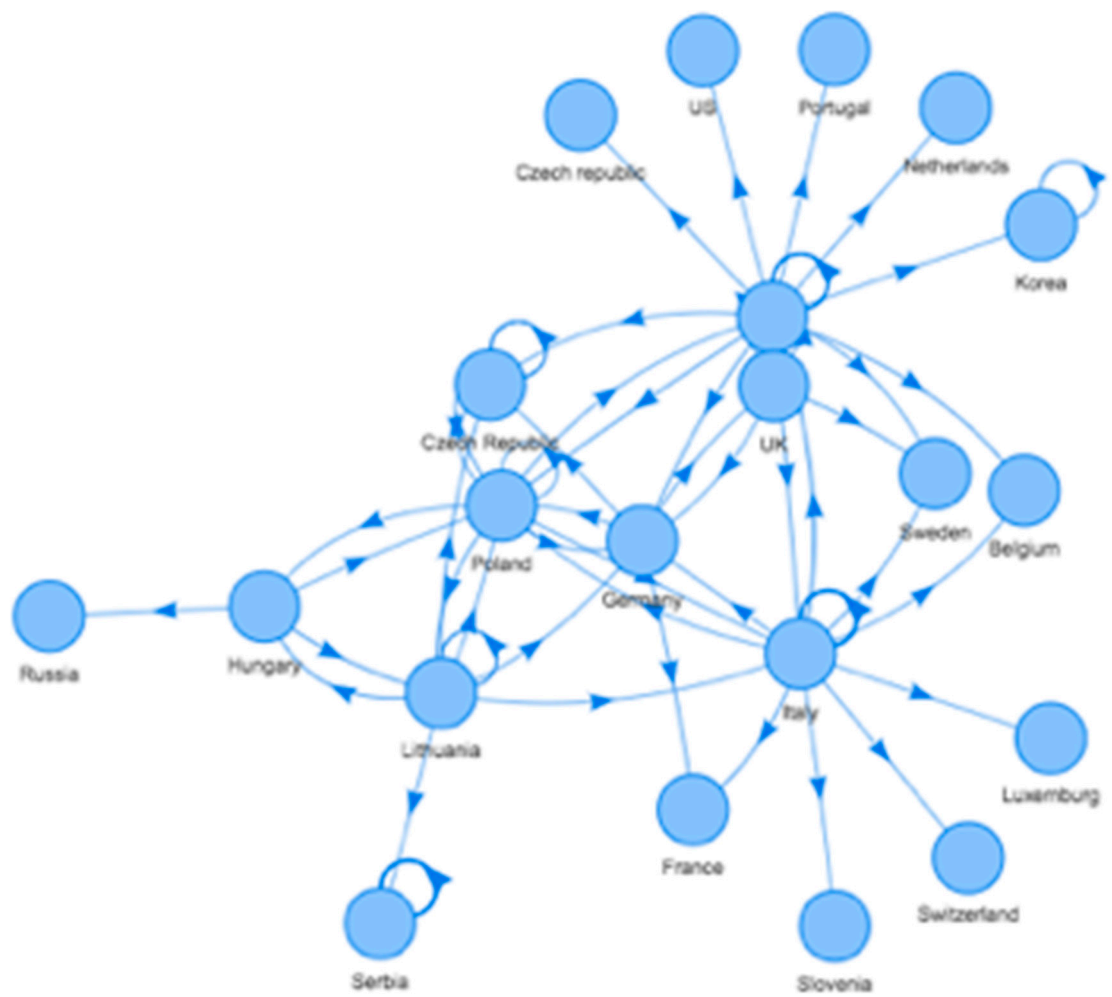

Figure S2 – Network countries analysis of the experts in the second wave

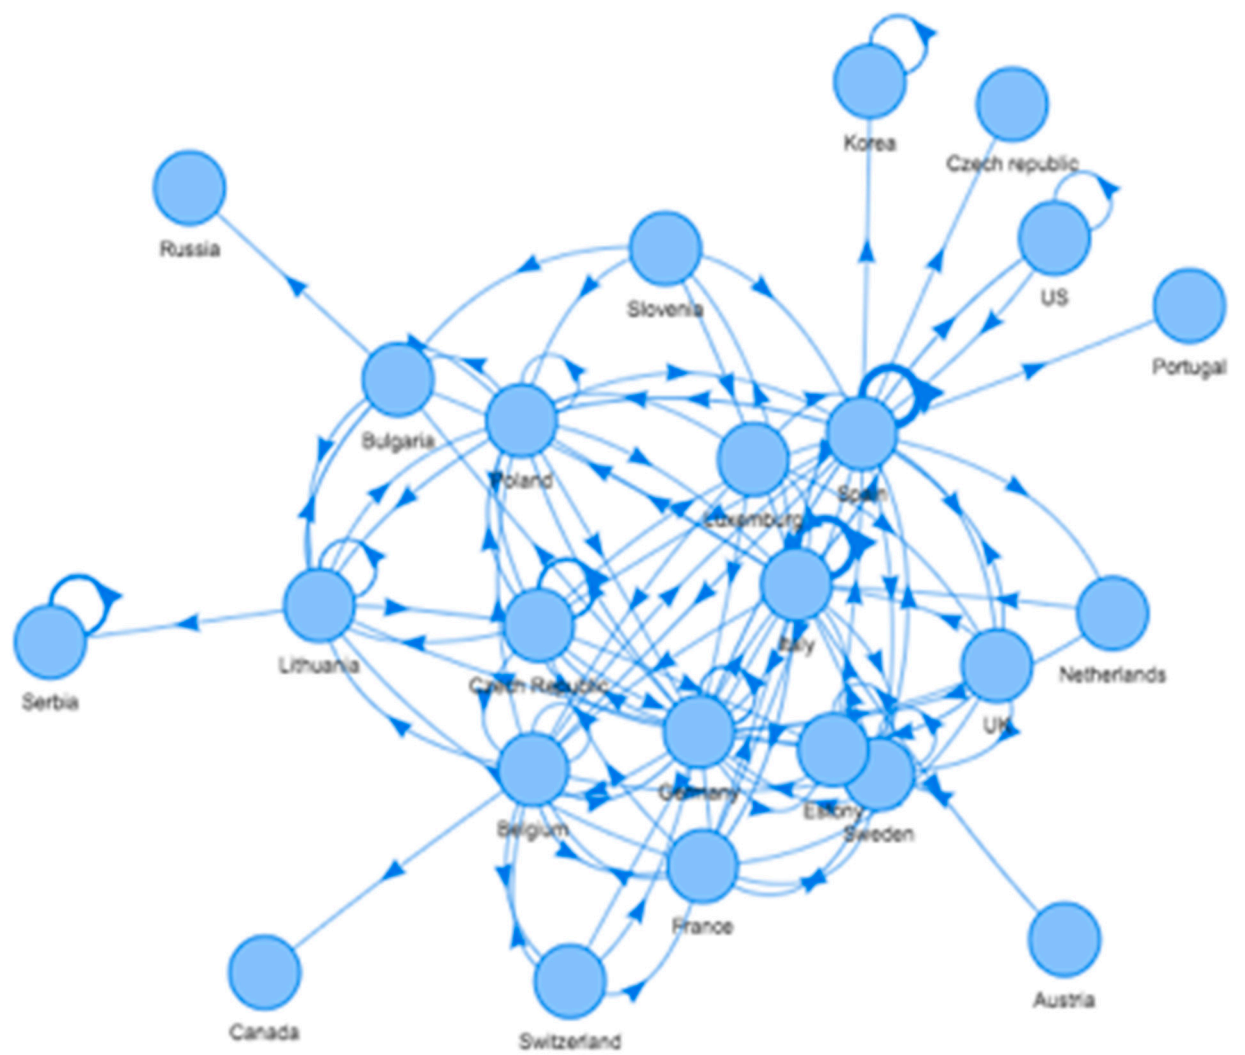

Figure S3 – Network countries analysis of the experts in the third wave.
