# Supplementary material for: A Novel Tool to Assess the Risk for African Swine Fever in Hunting Environments: The Balkan Experience
Source: MDPI journal article supplement (doi:10.3390/pathogens11121466), 2022-12-03

Supplementary File S7 - Maps showing the resulting risk following the introduction of mitigation measures of low, medium and high effort

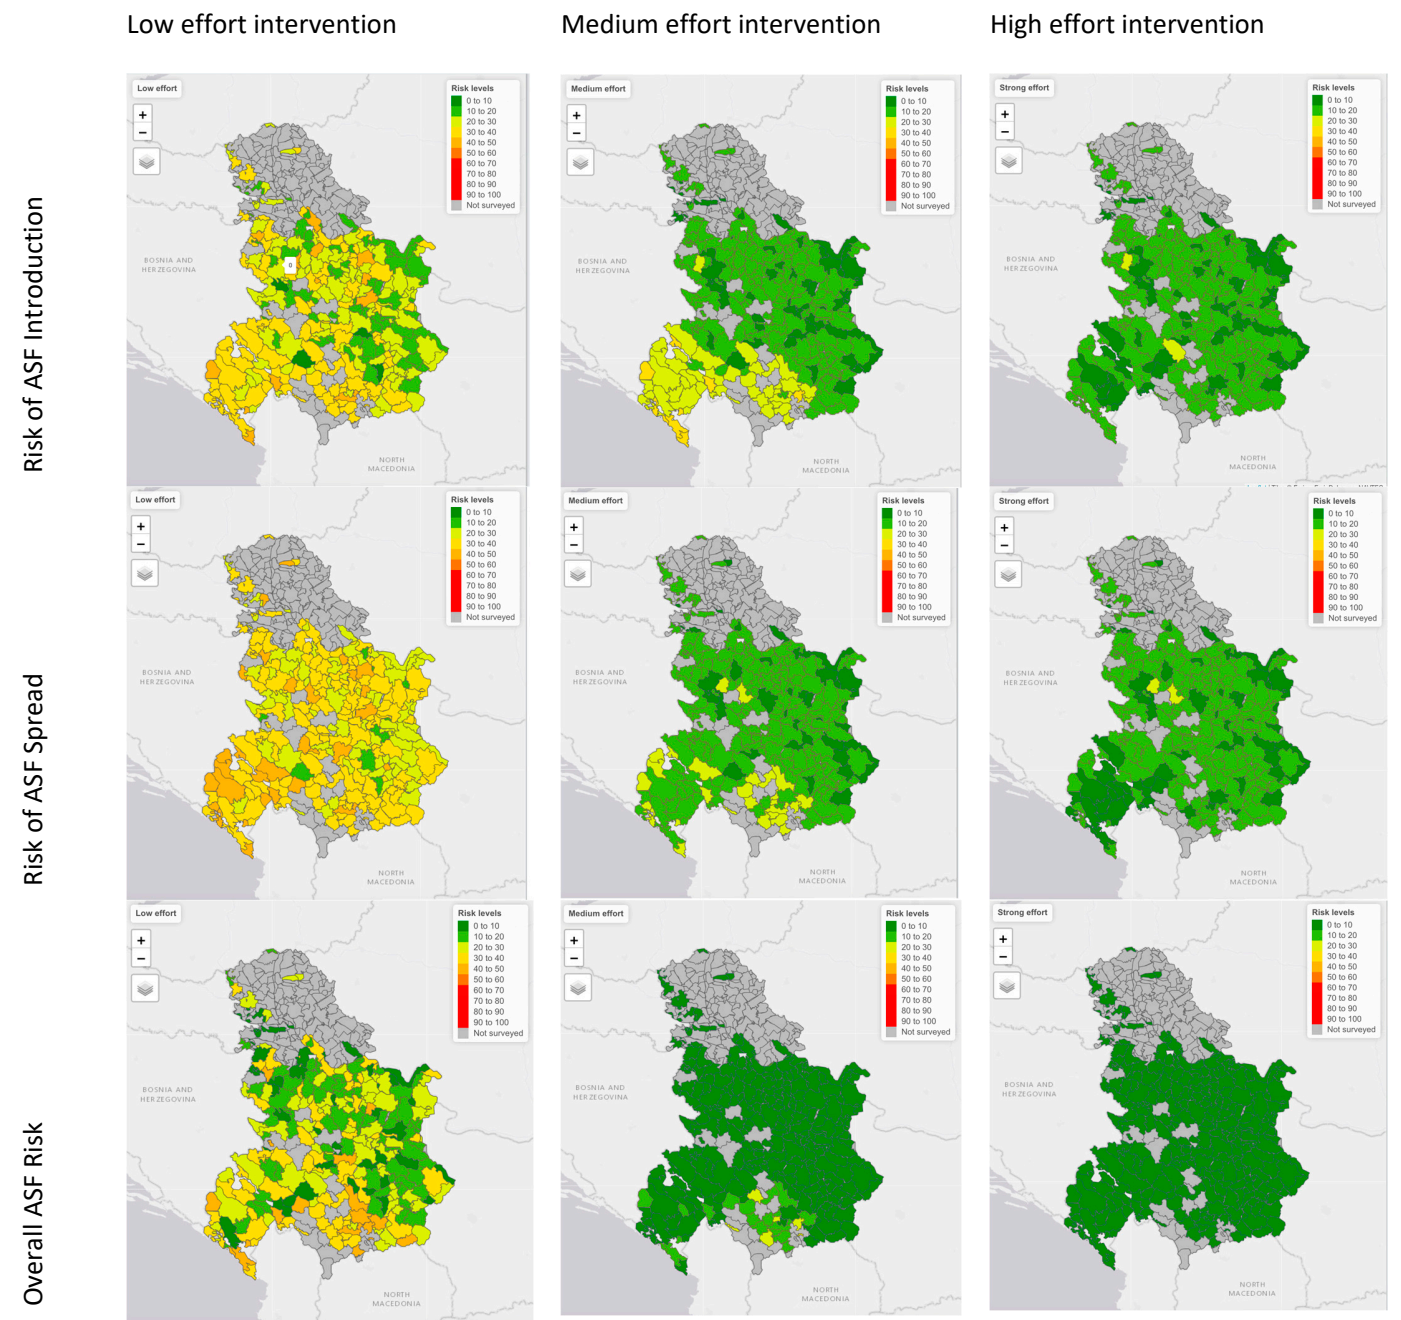

Supplement: s1 [file s1]
