# Supplementary material for: A Novel Tool to Assess the Risk for African Swine Fever in Hunting Environments: The Balkan Experience
Source: Pathogens. 2022 Dec 3;11(12):1466. doi: 10.3390/pathogens11121466 (PMC9787848; doi:10.3390/pathogens11121466)
Supplement: Supplementary file 1 [file pathogens-11-01466-s001.zip]

Archive with 7 entries (7 files):
- Supplementary File S1.pdf
- Supplementary File S2.xlsx
- Supplementary File S3.pdf
- Supplementary file S4.pdf
- Supplementary File S5.pdf
- Supplementary file S6.pdf
- Supplementary file S7.pdf
