# Supplementary material for: A Novel Tool to Assess the Risk for African Swine Fever in Hunting Environments: The Balkan Experience
Source: Pathogens. 2022 Dec 3;11(12):1466. doi: 10.3390/pathogens11121466 (PMC9787848; doi:10.3390/pathogens11121466)
Supplement: Supplementary file 1 [file pathogens-11-01466-s001.zip › Supplementary File S2.xlsx]

## Sheet: QuestionDiv (2)
Risk factors	Number of Related questions	Risk factor identification	Questions	Question Div
High WB density in the HPA	1	1.12a/1.13	1.12a: If YES, indicate the number ESTABLISHED by the annual management plan at the beginning of the hunting year. (If NO, write 0). 1.13: How large (in hectares) is the HPA (HPA) for WB?	x> mean , code = 1	x < mean, code = 0
Large size of the HPA	1	1.13 Mean as thresold	1.13: How large (in hectares) is the HPA (HPA) for WB?	x> mean , code = 1	x < mean, code = 0
Low proportion of fenced area within the HPA	2	1.13b/1.13	1.13b: How large (in hectares) is the HPA for WB in the Fenced Part? 1.13: How large (in hectares) is the HPA (HPA) for WB?	x < mean , code = 1	x > mean, code = 0
WB being transient (occasional or seasonal game)	1	1	1.12j: Are WBs present in the hunting area as transient, occasional or seasonal game during the hunting year?	yes = 1	no = 0
HPA is in contact (i.e. crossed or bordered) with roads and/or navigable watercourses.	2	0.5 / 0.5	2.3: Does the hunting area border the highway/regional road or do the roads pass through the hunting area? 2.5: Is the hunting ground in contact with navigable watercourses?	yes = 0,5	no = 0
HPA is in contact with cities and settlements	2	0.5 / 0.5	2.4: Is the hunting ground bordered by a narrow city (without suburban settlements) with the status of an area outside the hunting area, in accordance with the Law? 2.6: Is there a commercial catering/tourist facility on the hunting grounds?	yes = 0,5	no = 0
HG not collecting information on the last hunting activity of hunters	1	1	4.2: Does the hunting ground user obtain a statement for all persons involved in hunting about previous hunting activities within the past 30 days?	yes = 0	no = 1
Movements of live WB between HGs. (This refers only to WB moved/transported by humans)	2	0.5 / 0.5	1.15: Were WBs from other hunting grounds introduced into the hunting grounds within the last 12 months? 1.16: Have WBs been moved out from the hunting ground to other hunting grounds in the last 12 months?	yes = 0,5	no = 0
Shared personnel vehicles, equipment and facilities with other hunting ground/s	3	0.33 / 0.33 / 0.33	1.19: Does the hunting ground have a facility for temporary game meat storage? 1.20: Does the facility temporarily store the game from neighboring hunting grounds? 1.21: Does the hunting ground use a facility from nearby hunting grounds?	yes = 0,33	no = 0
Absence of transport and/or storage space used only for WB meat in order to avoid cross contamination of meat from other species.	1	1	1.19c: If YES, does the facility perform separate storage of game species? (If NO, skip the question)	yes = 0	no = 1
Driven hunt is practiced	1	1	1.17: Is WB hunting practiced by driven hunting?	yes = 1	no = 0
High number of visitors at the HG	NA	NA
Absence of fixed (designated) dressing areas	3	0.33 / 0.33 / 0.33	4.5: Is the evisceration of hunted WB carried out on the spot? 4.6: Is the evisceration of hunted WB carried out at a collection point within the hunting ground? 4.7: Is the evisceration of hunted WB carried out within the temporary game meat storage facility?	4.5: Yes = 0,33 4.6: Yes = 0 4.7: Yes = 0	4.5: Yes = 0 4.6: No = 0,33 4.7: No = 0,33
High number of pigs in low biosecurity farms (free range – backyard) present in HG	2	0.5 / 0.5	2.7: Are free-ranging domestic pigs present on the hunting grounds? 2.8: Are there premises containing pigs within the hunting grounds?	yes = 0,5	no = 0
Hunters who own pigs or work on pigs farms.	1	Mean as thresold	1.8a: How many members of the association either own pigs (backyard) or are employed in a pig farm? (Write 0 if none).	x> mean , code = 1	x < mean, code = 0
People who visited other hunting grounds or pig farms in the last 72 hours are allowed to hunt.	1	1	4.3: Does the hunting ground user prohibit access to hunting grounds for persons who have visited other hunting grounds or pig farms within the past 72 hours?	yes = 0	no = 1
Bringing meat products into the HPA is allowed	1	1	4.4: Does the hunting ground user prohibit bringing in meat products without a declaration into the hunting grounds?	yes = 0	no = 1
Absence of posters /flyers/briefings to inform the public and hunters upon entering a HPA about the importance of ASF and measures to prevent it	2	0.5 / 0.5	8.2: Does the User of the hunting ground put out any other posters to raise awareness among visitors to the hunting ground, on how they can prevent introduction or spread of ASF? 8.3 Did the User of the hunting ground inform its members, i.e. hunters, on how to prevent the introduction and spread of ASF?	yes = 0	no = 0,5
Sampling of hunted WB for ASF testing	1	1	3.1: Are WB in the hunting ground sampled according to the monitoring plan for classical and ASF for the current year?	yes = 0	no = 1
Active search for dead WB carcasses	2	0.5 / 0.5 (mean of WB carcasses as thresold for 0.5 value)	3.7: Is the hunting grounds being searched for WB carcasses? 3.7a: If YES, indicate the number of WB carcasses found during the current hunting year. (If NO, write 0).	3.7: Yes = 0 3.7a: x > mean = 0	3.7: No = 0,5 3.7a: x < mean = 0,5
Low effort/incentive in finding dead WB carcasses in the HG	3	0.33 / 0.33 / 0.33 (mean of WB carcasses as thresold)	3.9: Are found WB carcasses sampled? 3.9a: If YES, indicate the number of WB carcasses sampled during the current hunting year. (If NO, write 0). 3.9b: If YES, indicate the number of WB carcasses sampled during the past hunting year. (If NO, write 0).	3.9: Yes = 0 3.9a: x > mean = 0 3.9b: x > mean = 0	3.9: No = 0,33 3.7a: x < mean = 0,33 3.9b: x > mean = 0,33
Training of the HG manager in game pathology and handling of game and game meat	1	1	3.4: In accordance with veterinary regulations, have persons engaged in professional hunting activities, or game wardens in the hunting grounds, been trained in the knowledge of game pathology and handling of game and game meat?	yes = 0	no = 1
Absence of culling	2	0.5 / 0.5	3.6: Are WBs hunted in sanitary culling in the hunting grounds? 3.6c: If YES, are sanitary hunted WBs reported to the competent veterinary inspector? (If NO, skip the question).	yes = 0	no = 0,5
Meat or trophies leaving the hunting ground without an ASF PCR-negative test	2	0.5 / 0.5	4.11: Is WB meat from regular hunting placed on the market before receiving negative laboratory results of diagnostic testing for an infectious disease, like ASF? 4.14: Are WB trophies placed on the market before receiving negative laboratory results of diagnostic testing for an infectious disease, like ASF?	yes = 0	no = 0,5
Absence of disinfectants and cleaning and disinfection procedures for equipment, facilities, meat storage, evisceration sites.	5	0.2 / 0.2 / 0.2 / 0.2 / 0.2	5.1: Are appropriate disinfectants used with a good term of validity? 5.4: Are the outside evisceration sites disinfected after the evisceration has been carried out? 5.7: Are temporary storage equipment and facilities cleaned and disinfected after each use? 5.9: Is there equipment for field disinfection in the hunting ground? 5.10: Is there biosafety protective equipment available?	yes = 0	no = 0,2
Absence of disinfection point for every visitor	NA	NA
Absence of disinfection barriers for vehicles	1	1	5.8: Are disinfectant barriers present on the hunting grounds?	yes = 0	no = 1
Absence of cleaning and disinfection of hands, footwear, clothing and personal equipment after offal and manipulation of dead animals	1	1	6.6: Do person disinfect their hands, clothing, footwear, and equipment after manipulation or handling offal or found dead animals?	yes = 0	no = 1
Vehicles used for hunting that leave the HG without being cleaned and disinfected first	2	0.5 / 0.5	5.5: Within the hunting ground, are official vehicles the only vehicles used? 5.6: Are vehicles cleaned and disinfected after each transportation?	yes= 0	no = 0,5
No systematic destruction of offal (from hunted animals)	1	1	6.1 Which of the following methods are used to dispose offal (from hunted animals? Leaving on the field Burial on the spot Burial in a pit Burning Rendering	left on the field = 1	other answers = 0
Limited disposal of found dead WB	3	0.3 / 0.3 / 0.3	6.3.e: How often does the User of the hunting ground use an authorized company to dispose found dead WB? 6.4.e: How often does the User of the hunting ground use pits (located on the hunting ground) to dispose found dead WB? 6.5.c: How often does the User of the hunting ground use burning to dispose found dead WB? Always Often Rarely Never	Always = 0	Often/Rarely/Never = 0,33
Absence of a disposal plan in case of an ASF outbreak	1	1	6.7: Are there designated sites for the new pits, in case of the appearance of an infectious animal disease, like ASF?	yes = 0	no = 1
Absence of cargo transport or leak-proof bags/tanks to move dead WB	2	0.5 / 0.5	6.8: Does the hunting ground have cargo transport equipment (such as tractors or trailers) for moving dead WB carcasses within the hunting ground? 6.11 Does the hunting ground have leak-proof containers or packaging material for packaging and transporting dead WB carcasses within the hunting ground?	yes = 0	no = 0,5
Supplementary feeding of WB (Note: consider only impact on behaviour)	1	1	7.1: Does the hunting ground user practice WB supplementary feeding?	yes = 1	no = 0
Supplementary feeding of WB with products of animal origin form uncontrolled sources (swill or kitchen waste)	1	1	7.3: Does the hunting ground user use swill in WB feeding?	yes = 1	no = 0
Access to landfills or scavenging places for WB	2	0.5 / 0.5	7.4: Do WBs have access to landfills? 7.5: Do WBs have access to scavenging places?	yes = 0,5	no = 0
Lack of compliance by the HG user i.e. the user has not applied measures ordered by the authorities in the past 2 years	1	1	9.1a: If YES, have they been implemented?	yes = 0	no = 1
Abbreviations: ASF : Afican Swine Fever ;HG : Hunting ground; HPA : Hunting productive area; WB = Wild boar ;
